# Supplementary material for: Subnanomolar antisense activity of phosphonate-peptide nucleic acid (PNA) conjugates delivered by cationic lipids to HeLa cells
Source: PubMed Central journal article supplement — Nucleic Acids Res. 2008 Jul 2;36(13):4424–32. doi: 10.1093/nar/gkn401 (PMC2490735; doi:10.1093/nar/gkn401), 2008-07-02
Supplement: gkn401_1.pdf [file gkn401_1.pdf]

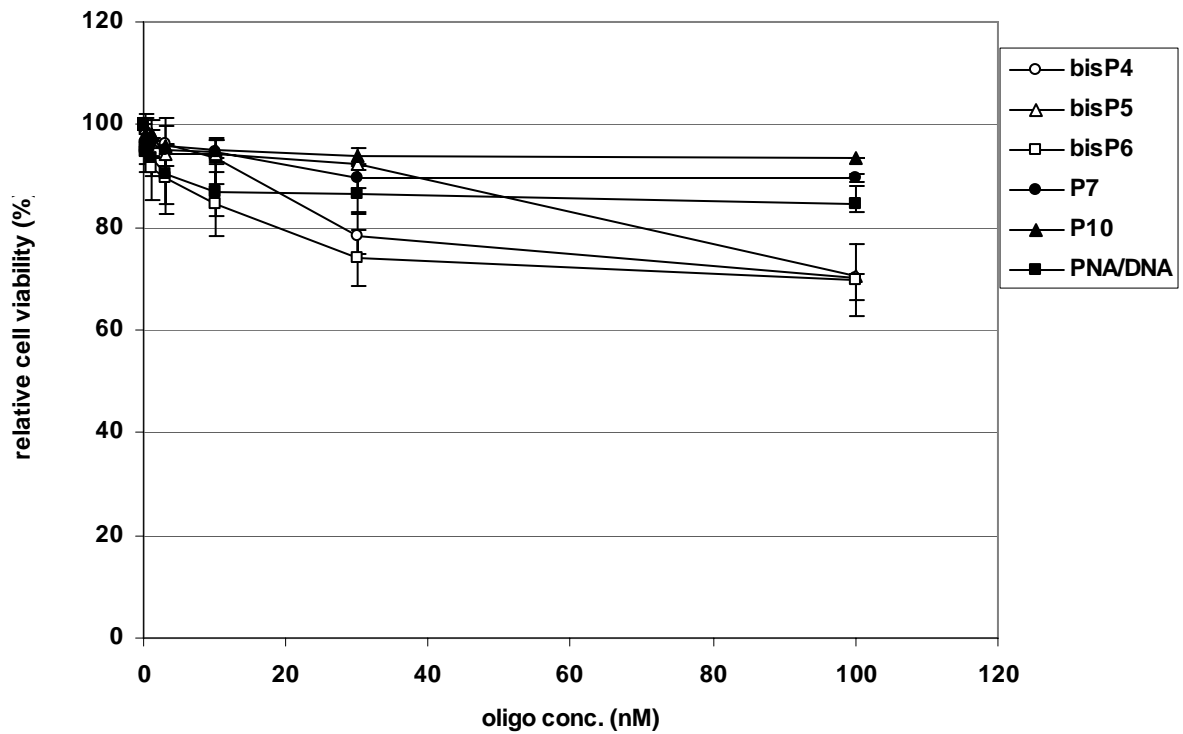

*Cytotoxicity test* –Cell viabilities were determined 24 h after PNA transfection by using the CellTiter 96 Aqueous Non-Radioactive Cell Proliferation Assay (Promega) according to the manufacture’s instructions. The absorbance of PNA-treated cell samples was normalized to the absorbance of control cells samples (with LipofecAMINE alone) and is presented as relative cellular viability (the value of the control was counted as 100%) .
